# Supplementary material for: Key Issues for Realizing Open Ecoacoustic Monitoring in Australia
Source: Frontiers journal article supplement (doi:10.3389/fevo.2021.809576), 2022-01-14
Supplement: Data_Sheet_1.PDF [file Data_Sheet_1.PDF]

## ACOUSTIC SENSING DEVICES

Table A. Acoustic Sensing Devices (with associated Audio and Metadata Information)

| DEVICE                                    | TARGET SPECIES                                                                                      | SAMPLE RATES                                  | RECORD CHANNELS                 | RECORDING FORMAT                         | MICROPHONE/S                                                                                                                                | FILTERS                                                                    | CONFIGURATION SOFTWARE (SCHEDULE, CLOCK, GPS)                                                                                                                                                                            | RECORDING METADATA                                                                                                                                                                                                                                                                                                                                        | RECORDING SUMMARY                                                                                                                                                                                                                                                                              | COMPATIBLE ANALYSIS SOFTWARE           |
|-------------------------------------------|-----------------------------------------------------------------------------------------------------|-----------------------------------------------|---------------------------------|------------------------------------------|---------------------------------------------------------------------------------------------------------------------------------------------|----------------------------------------------------------------------------|--------------------------------------------------------------------------------------------------------------------------------------------------------------------------------------------------------------------------|-----------------------------------------------------------------------------------------------------------------------------------------------------------------------------------------------------------------------------------------------------------------------------------------------------------------------------------------------------------|------------------------------------------------------------------------------------------------------------------------------------------------------------------------------------------------------------------------------------------------------------------------------------------------|----------------------------------------|
| Song Meter 4 (Wildlife Acoustics)         | Birds, frogs and other vocal animals in the wild                                                    | 8, 12, 16, 22.05, 24, 32, 44.1, 48, 96kHz     | Single or dual channel          | 16-bit PCM .wav<br>Or<br>16-bit PCM .w4v | Two microphones built in<br><br><b>Adjustable gain</b><br><br><i>*Option for cabled microphone or hydrophone attachments</i>                | -High-pass<br>-Anti-alias                                                  | SM4 Configurator software (PC)<br><br>Or device buttons<br><br><i>Configures settings and schedules from a computer.</i><br><br><i>*Option for GPS antenna attachment (automatic setting of date, time and location)</i> | <b>Metadata embedded in recordings (GUANO standard):</b><br>-Device model<br>-Device serial number<br>-Firmware version<br>-Prefix<br>-Timestamp<br>-Temperature<br>-GPS coordinates<br>-Schedule and Settings                                                                                                                                            | <b>Summary (.txt) file, lines appended once per minute, file in .csv format, including:</b><br>-Date and time<br>-Latitude and longitude<br>-Power (V)<br>-Temperature (C)<br>-#files<br>-MIC0TYPE and MIC1TYPE                                                                                | Kaleidoscope Light<br>Kaleidoscope Pro |
| Song Meter SM4Bat FS (Wildlife Acoustics) | Recording and detecting bat vocalisations.<br><br>Advanced recorder triggering (when bats present). | 192, 256, 384, 500 kHz                        | Single channel                  | 16-bit PCM .wav<br>or<br>16-bit PCM .w4v | One ultrasonic microphone mounted on recording device.<br><br>Can record ultrasonic and non-ultrasonic, but not scheduled at the same time. | -Optional high-pass<br>-Optional noise scrubbing to delete false triggers. | SM4 Configurator Software (PC)<br><br>Or device buttons<br><br><i>Configures settings and schedules.</i>                                                                                                                 | <b>Metadata embedded in recordings (GUANO standard):</b><br>-Device model<br>-Device serial number<br>-Firmware version<br>-Prefix<br>-Timestamp<br>-GPS coordinates (manually entered as well as from GPS accessory if attached)<br>-Schedule and settings<br><br><i>*Some of the metadata information is visible in Kaleidoscope computer software.</i> | <b>Summary (.txt) file, lines appended once per minute, file in .csv format, including:</b><br>-Date and time (time zone set in location settings)<br>-Latitude and longitude (from GPS accessory or manually entered)<br>-Power (V)<br>-Temperature (C)<br>-#files<br>-#scrubbed<br>-MIC_TYPE | Kaleidoscope Light<br>Kaleidoscope Pro |
| Song Meter Mini (Wildlife Acoustics)      | Birds, vocal wildlife                                                                               | 8, 12, 16, 22.05, 24, 32, 44.1, 48 and 96 kHz | Single channel, option for dual | 16-bit PCM .wav                          | One microphone built in<br><br><i>*Option for second, externally attached microphone</i>                                                    | -High-pass<br>-Anti-alias<br>-Low-pass                                     | Mini Configurator App (bluetooth connection: smartphones or tablets)<br><br><i>Clock of recorder set to match mobile device.</i>                                                                                         | <b>Metadata embedded in .wav files (GUANO standard):</b><br>-Firmware version<br>-Length (of the file in seconds)<br>-Loc Position (latitude and longitude)<br>-Make<br>-Model<br>-Original File Name                                                                                                                                                     | <b>Summary (.txt) file saved to microSD card:</b><br>-Date<br>-Time<br>-Latitude<br>-Longitude<br>-Power (V)                                                                                                                                                                                   | Kaleidoscope Light<br>Kaleidoscope Pro |

|                                          |                                                                        |                        |                                 |                                       |                                                                                                                                                  |                                                                               |                                                                                                                                                                                                                                                                                                                                                           |                                                                                                                                                                                                                                                                                                                                                                                                                                                                                                                                                                                                                                                                                                                                    |                                                                                                                                                               |                                     |
|------------------------------------------|------------------------------------------------------------------------|------------------------|---------------------------------|---------------------------------------|--------------------------------------------------------------------------------------------------------------------------------------------------|-------------------------------------------------------------------------------|-----------------------------------------------------------------------------------------------------------------------------------------------------------------------------------------------------------------------------------------------------------------------------------------------------------------------------------------------------------|------------------------------------------------------------------------------------------------------------------------------------------------------------------------------------------------------------------------------------------------------------------------------------------------------------------------------------------------------------------------------------------------------------------------------------------------------------------------------------------------------------------------------------------------------------------------------------------------------------------------------------------------------------------------------------------------------------------------------------|---------------------------------------------------------------------------------------------------------------------------------------------------------------|-------------------------------------|
|                                          |                                                                        |                        |                                 |                                       |                                                                                                                                                  |                                                                               |                                                                                                                                                                                                                                                                                                                                                           | -Sample rate<br>-Serial number<br>-Timestamp<br>-WA Song Meter Audio settings<br>-WA Song Meter Prefix<br><br><i>*Software that is capable of reading GUANO format metadata can access the information within the files.</i>                                                                                                                                                                                                                                                                                                                                                                                                                                                                                                       |                                                                                                                                                               |                                     |
| Song Meter Mini Bat (Wildlife Acoustics) | Bats<br><br>Ability to trigger recording based on incoming ultrasound. | 192, 256, 384, 500 kHz | Single channel, option for dual | 16-bit PCM .wav and/or 16-bit PCM .zc | One ultrasonic microphone built in<br><br><i>*Option for second, acoustic microphone to be attached (to record birds, frogs, other wildlife)</i> | -High-pass<br>-Low-pass<br>-Optional noise scrubbing to delete false triggers | Mini Configurator App (Bluetooth connection: smartphones or tablets)<br><br><i>Harnesses processing power of modern smart phones for remote scheduling and status checking.</i><br><br><b>Internal clock, location and time zone set during pairing with mobile device.</b><br><br>*mini.config file available to copy to computer, SD card and recorder. | <b>Metadata embedded in .wav files (GUANO standard):</b><br>-Firmware version<br>-Length (of the file in seconds)<br>-Loc Position (latitude and longitude)<br>-Make<br>-Model<br>-Original File Name<br>-Sample rate<br>-Serial number<br>-Timestamp<br>-WA Song Meter Audio settings<br>-WA Song Meter Prefix<br><br><b>for .zc files</b> (same minus sample rate):<br>-Firmware version<br>-Length (of the file in seconds)<br>-Loc Position (latitude and longitude)<br>-Make<br>-Model<br>-Original File Name<br>-Serial number<br>-Timestamp<br>-WA Song Meter Audio settings<br>-WA Song Meter Prefix<br><br><i>*Software that is capable of reading GUANO format metadata can access the information within the files.</i> | <b>Summary (.txt) file saved to SD card:</b><br>-Date<br>-Time<br>-Latitude<br>-Longitude<br>-Power (V)<br>-#FS files<br>-#ZC files<br>-#Scrubbed noise files | Kaleidoscope Light Kaleidoscope Pro |

|                                       |                                                                                       |                                       |                                                                                                                                                             |                             |                                                                                                                                              |                                                                                                                   |                                                                                                                                                                                                                                                                              |                                                                                                                                                                                                                                                                                                                                                                                                                                       |                                                                                                                                                                                                                                                                                               |                                         |
|---------------------------------------|---------------------------------------------------------------------------------------|---------------------------------------|-------------------------------------------------------------------------------------------------------------------------------------------------------------|-----------------------------|----------------------------------------------------------------------------------------------------------------------------------------------|-------------------------------------------------------------------------------------------------------------------|------------------------------------------------------------------------------------------------------------------------------------------------------------------------------------------------------------------------------------------------------------------------------|---------------------------------------------------------------------------------------------------------------------------------------------------------------------------------------------------------------------------------------------------------------------------------------------------------------------------------------------------------------------------------------------------------------------------------------|-----------------------------------------------------------------------------------------------------------------------------------------------------------------------------------------------------------------------------------------------------------------------------------------------|-----------------------------------------|
| Song Meter Micro (Wildlife Acoustics) | Continuous recordings of frequencies up to 20 kHz (not suitable for most bat species) | 8, 12, 22.05, 24, 32, 44.1, 48, 96kHz | Single channel                                                                                                                                              | 16-bit PCM .wav             | One microphone built in                                                                                                                      | -High-pass<br>-Low-pass                                                                                           | Micro Configurator App (bluetooth connection: smartphones or tablets)<br><br><i>Harnesses processing power of modern smart phones for remote scheduling and status checking.</i><br><br><b>Internal clock, location and time zone set during pairing with mobile device.</b> | <b>Metadata embedded in .wav files (GUANO standard):</b><br>-Firmware version<br>-Length (of the file in seconds)<br>-Loc Position (latitude and longitude)<br>-Make<br>-Model<br>-Original File Name<br>-Sample rate<br>-Serial number<br>-Timestamp<br>-WA Song Meter Audio settings<br>-WA Song Meter Prefix<br><br><i>*Software that is capable of reading GUANO format metadata can access the information within the files.</i> | <b>Summary (.txt) file saved to microSD card:</b><br>-Data<br>-Time<br>-Latitude<br>-Longitude<br>-Power (V)                                                                                                                                                                                  | Kaleidoscope Light Kaleidoscope Pro     |
| BAR v 1.4 (Frontier Labs)             | Frogs and birds                                                                       | 8, 16, 22.05, 44.1 , 48 and 96 kHz    | Single or dual channel<br><br>(One channel underneath recorder, second channel on the side to connect an extension cable or second microphone / hydrophone) | 16-bit .wav or 16-bit .FLAC | Can attach up to two microphones.<br><br>Can connect either a standard, low frequency or hydrophone microphone<br><br><b>Adjustable gain</b> | -Anti-aliasing filters                                                                                            | Scheduler GUI Program (PC).<br><br><i>Create and edit recording schedules, view estimated battery life and when SD-card will be full.</i><br><br><b>Clock updated by GPS time synchronisation.</b><br><br><b>GPS position lock with 3+ satellites.</b>                       | <b>Metadata embedded in audio? Unknown.</b><br>.                                                                                                                                                                                                                                                                                                                                                                                      | <b>Detailed diagnostic log file is (created every time recorder is used, each action is logged with time and date stamp) includes:</b><br>-Gain used<br>-Start and end time<br>-GPS points (GPS lock 3 satellites or more OR position set in Scheduler GUI Program<br><b>Format? Unknown.</b> | N/A                                     |
| Audio Moth (Open Acoustic Devices)    | Frogs, birds and bats                                                                 | 8 – 384 kHz                           | Single channel                                                                                                                                              | 16- bit (PCM) .wav          | One microphone built-in<br><br>Audible and ultrasonic frequencies<br><br><b>Adjustable gain</b>                                              | -Optional low-pass filter, high-pass filter and band-pass filter<br><br>-Option for amplitude threshold recording | AudioMoth Configuration App<br><br><i>Schedule recording periods, customise recording gain and sample rates, calculate device lifespan given configuration, set recorder timezone,</i>                                                                                       | <b>Metadata embedded in .wav file:</b><br>-Recording date and time<br>-Sample rate<br>-Gain level recorded at<br>-Timestamp<br>-Unique ID of device<br>-Battery level<br>-Amplitude threshold (if chosen)<br>-Temperature                                                                                                                                                                                                             | Metadata stored in “comments” field of EXIF metadata.<br><br><i>Metadata software such as exiftool is required to view this information and can edit metadata information to comply</i>                                                                                                       | Tools from Rainforest Connection (RFCx) |

[illegible]
